## Title

How can rural community-engaged health services planning affect sustainable health care system changes? - A process description and qualitative analysis of data from the Rural Coordination Centre of British Columbia's Rural Site Visits Project

## Authors

C Stuart Johnston, Rural Co-ordination Centre of British Columbia, Canada

Erika Belanger, Rural Co-ordination Centre of British Columbia, Canada

Krystal Wong, Rural Co-ordination Centre of British Columbia, Canada

David Snadden, University of British Columbia Faculty of Medicine, Northern Medical Program, Prince George, BC, Canada. (Corresponding Author: [david.snadden@ubc.ca](mailto:david.snadden@ubc.ca))

## **Abstract**

### Objectives

The objectives of the Rural Site Visit Project (SV Project) were to develop a successful model for engaging all 201 communities in rural British Columbia, Canada, build relationships and gather data about community health care issues to help modify existing rural health care programs and inform government rural health care policy.

### Design

An adapted version of Boelen's health partnership model was used to identify each community's Health Care Partners: health providers, academics, policy makers, health managers, and community representatives. Qualitative data was gathered using a semi-structured interview guide. Major themes were identified through content analysis, and this information was fed back to the government and interviewees in reports every six months.

### Setting

The 107 communities visited thus far have health care services that range from hospitals with surgical programs to remote communities with no medical services at all. The majority have access to local primary care.

### Participants

Participants were recruited from the Health Care Partner groups identified above using purposeful and snowball sampling.

### Primary and secondary outcome measures

A successful process was developed to engage rural communities in identifying their health care priorities, whilst simultaneously building and strengthening relationships. The qualitative data was analysed from 185 meetings in 80 communities and shared with policy makers at governmental and community levels.

## Results

36 themes have been identified and three overarching themes that interconnect all the interviews, namely Relationships, Autonomy and Change Over Time, are discussed.

## Conclusion

The SV Project appears to be unique in that it is physician led, prioritizes relationships, engages all of the health care partners singly and jointly in each community, is ongoing, provides feedback to both the policy makers and all interviewees on a 6-monthly basis and, by virtue of its large scope, has the ability to produce interim reports that have helped support system change.

## Article Summary

- This study process has adapted Boelen’s health partnership model and is unique in that it is physician led, prioritizes relationships, engages all of the health care partners singly and jointly in each community, is ongoing, provides feedback to both the policy makers and all interviewees on a 6-monthly basis.
- A successful method of engaging with rural communities and building relationships and trust across multiple stakeholder groups is described that contributed to influencing positive health care system changes.
- As all communities in one province are being visited a picture of rural health care initiatives and challenges is highly comprehensive and therefore able to influence policy.
- One of the main limitations in this study is that because the interviewers were experienced health care providers, power differentials may have existed which may have introduced bias in the discussions.
- A potential limitation is the enormous amount of data to handle and analyze in a rigorous way, which was mitigated by having two full time analysts working together to ensure consistency with frequent meeting with the research team to consider and agree emerging themes.

1 How can rural community-engaged health services planning affect sustainable health care  
2 system changes? – A process description and qualitative analysis of data from the Rural  
3 Coordination Centre of British Columbia’s Rural Site Visits Project

4  
5 **Introduction**

6 British Columbia (BC), Canada, has a population of approximately 5 million. About fourteen  
7 percent (631,776) (1) are rural citizens distributed unevenly over an area of 944,738 km<sup>2</sup>. BC is  
8 geographically diverse with a broken 27,000 km coastline and extensive mountain ranges that  
9 make for long and often dangerous travel, complicated at times by wildfires, floods, avalanches  
10 and harsh winter conditions. Access to health care services for rural citizens is often limited by  
11 the expansive geography, provider availability (2) and transportation issues (3).

12 Support programs for rural physicians in BC are overseen by the Joint Standing Committee on  
13 Rural Issues (JSC), a committee comprised of equal numbers of provincial Ministry of Health  
14 representatives and rural physicians. The JSC manages approximately C\$150M (2020) of  
15 funding annually for programs and projects that improve health care delivery in rural BC  
16 (<https://www2.gov.bc.ca/assets/gov/health/practitioner-pro/rural-guide.pdf>). Some of this  
17 work is delivered by the Rural Coordination Centre of BC (RCCbc), which is funded by the JSC to  
18 coordinate and improve rural health care throughout the province.

19 The Rural Site Visits Project (SV Project) was initiated in 2017 by rural physicians with a proposal  
20 to the JSC who tasked the RCCbc with visiting 201 rural and Indigenous BC communities  
21 identified as eligible for rural benefits under the RSA  
22 ([https://www2.gov.bc.ca/gov/content/health/practitioner-professional-resources/physician-](https://www2.gov.bc.ca/gov/content/health/practitioner-professional-resources/physician-compensation/rural-practice-programs/rural-practice-subsidiary-agreement)  
23 [compensation/rural-practice-programs/rural-practice-subsidiary-agreement](https://www2.gov.bc.ca/gov/content/health/practitioner-professional-resources/physician-compensation/rural-practice-programs/rural-practice-subsidiary-agreement)). The RSA is an

24 agreement between the Government of BC and the Doctors of BC (a professional organization  
25 that represents 14,000 physicians, medical residents and medical students in BC.  
26 <https://www.doctorsofbc.ca/> ).

27 The purpose of the SV Project was to build relationships between rural physicians, health care  
28 providers, health administrators, municipal leadership, First Nations leadership, first  
29 responders, academia and policy makers through listening and gathering data systematically  
30 about local successes, innovations and challenges relating to rural health care delivery. This  
31 data is guiding the development of JSC programs and informing government Rural Health Care  
32 policy.

33 In 1978 the declaration of the Alma-Ata International Conference on Primary Health Care stated  
34 that: “The people have the right and duty to participate individually and collectively in the  
35 planning and implementation of their health care” (4). Current trends in rural health services,  
36 however, aim to reduce infrastructure and support to achieve greater efficiencies through  
37 centralization of services (5, 6). Small rural communities have had to be proactive in securing  
38 local health services to resist this development (7, 8), requiring improved relationships and  
39 communication between the policy makers and communities.

40 Community participation has been seen as a more complete approach to health development  
41 (9) leading to culturally and contextually appropriate decisions being made about rural health  
42 services (10, 11). Relationship building between stakeholders is also seen as more effective  
43 than attempting to provide a myriad of health care services (12, 13), especially as each rural  
44 community is unique and “one size fits all” approaches are largely ineffective (6, 14). While

45 there have been efforts by health service policy makers to align their actions with rural  
46 communities' expressed priorities (15, 16), the processes used for community engagement  
47 have received less attention (17) and descriptions seldom include adequate documentation of  
48 the processes involved (17, 18).

49 The community engagement literature does not show examples of rural health projects  
50 initiated and led by physicians, even though physicians have been key partners in other  
51 research on rural community-engaged health services planning (15). Much of the research on  
52 community engagement in rural health service planning has had a specific focus, for example in  
53 improving immunization programs in Nigeria (17) or chronic disease care in the Torres Strait  
54 Islands (13). There are some examples of research focused on community participation for  
55 broader primary care reform, for example, in the Northern Health Authority region of BC (15)  
56 and the Remote Service Futures (RSF) Project in Scotland (10, 12, 16). The former has resulted  
57 in some sustained changes to date, for example the establishment of Primary Care Nurses,  
58 improved antenatal care and regional palliative care services (15). When the RSF outcomes  
59 were reviewed in 2014: "Only one direct sustained service change was found" (19). These raise  
60 the question of how best to affect sustainable beneficial rural health system changes using  
61 community engagement processes. The project described here attempts to address this issue.

62

## 63 **Design & Methods**

### 64 Theoretical Approach

65 The Health Partnership model described by Boelen (20) was used. This identifies five partners:  
66 health professionals, academic institutions, policy makers, health managers and citizens and  
67 recommends they meet to identify ways to improve health systems. The concept of meeting  
68 with the partners together in each community was modified to include additional separate  
69 meetings with each of the partners. Who constituted the health partners could be different in  
70 each community, so the concept was adapted to the local context to include those present in  
71 the community. This could include others such as first responders, business and non-profit  
72 groups. It was not possible to have combined partner meetings in all communities as it was not  
73 always possible to find a date and time within the visits time line that worked for everyone.

74 The interviews incorporated an Appreciative Inquiry approach (21, 22) with intentional listening  
75 using a semi-structured interview guide. The interviews focused on how rural community  
76 members perceived health care delivery within their respective communities seeking successes  
77 and innovations as well as challenges. To process the large volume of qualitative data collected,  
78 qualitative content analysis (23) was used.

#### 79 Patient and Public Involvement

80 Public input into the research project occurred during the initial pilot Site Visits to eight rural  
81 communities.

82 Public input was used to shape the community engagement process and the interview guide.

83 The initial interview guide was developed by the investigators, who had many years of rural  
84 health care experience, to elicit broad discussion about multiple health care issues. The guide



85 was refined based on public and provider input during pilot visits. The interview format  
86 continued to be iteratively improved based on feedback from subsequent Site Visits.  
87 Persons representing the health care partner groups in each community were recruited initially.  
88 Snowball recruitment was then used to include other valuable perspectives.  
89 Participants were asked for feedback on the interview process and whether the time taken was  
90 appropriate.  
91 Every six months a Community Feedback Report is circulated to all past interviewees in which  
92 the latest results are discussed. The report is in the public domain and dissemination is  
93 encouraged.

#### 94 Site Recruitment

95 The sites identified for the SV Project were the 201 communities identified under the RSA.

#### 96 Arranging Site Visits

97 Sites are selected six to twelve months in advance. Three to six months prior to a Site Visit,  
98 recruitment of participants commences and RCCbc staff coordinate the planning. Depending on  
99 community size and location site visits last one to three days and involve one to five  
100 communities.

#### 101 Site Visits Team

102 A Site Visits team consists of at least one Site Visitor and one RCCbc staff member, who  
103 coordinates the visits. The Site Visitors comprise 19 rural physicians and one midwife. A one-  
104 day training session for interviewers included training in Appreciative Inquiry techniques and

105 qualitative interviewing and cultural safety through the San'yas Indigenous Cultural Safety  
106 Course ( <http://www.sanyas.ca/>). Site Visitors were individually mentored by the Program  
107 Leads on their first visits. On some Site Visits guests are invited. The purpose of inviting a guest  
108 is to assist urban-based allies in their understanding of how health care functions in small rural  
109 communities. Guests have included policy makers, researchers, health care workers,  
110 administrators, and educators.

### 111 Participant Recruitment

112 The study population included participants who identified themselves as living or working in an  
113 RSA community and were part of one or more of the partner groups identified by Boelen (20).  
114 Participants were recruited using purposeful and snowball sampling (23) through the following  
115 methods:

- 116 • Email and phone contact through publicly available information
- 117 • Recruitment posters in doctors' lounges, hospitals, clinics, and municipal buildings
- 118 • Contacting pre-existing contacts who provide connections to potential participants
- 119 • Asking participants to suggest others who fit the inclusion criteria

120 Initial contact was made by telephone or e-mail with a follow-up invitation that detailed the  
121 project background, aims and goals and included a copy of the interview guide and consent  
122 form. Participants were invited to participate in one-on-one interviews or focus groups (if there  
123 was more than one person from an identified health partner group) and dates established.  
124 Interviews took place in the communities, however since March 2020, eleven virtual interviews  
125 have been trialed as a result of Covid-19 restrictions.

126 Data Collection

127 Each health partner group (between one and sixteen participants) was interviewed separately.  
128 This was followed by a combined partner focus group (between two to ten people) with a  
129 representative from each of the health partner groups previously interviewed. A semi-  
130 structured interview guide was used which has been iteratively refined following community  
131 visits, in keeping with standard qualitative methods (supplementary file “Interview Guide”). The  
132 guide was informed by Appreciative Inquiry and public input in order to build relationships and  
133 to better understand how rural community members perceive health care delivery within their  
134 respective communities including health care successes, innovations and challenges that inhibit  
135 their ability to access services in an equitable manner. Interviews were recorded digitally and  
136 transcribed. Interviews generally lasted one hour. Transcripts were returned to participants  
137 within four weeks for verification, alteration, or withdrawal if requested.

138 Data Analysis

139 NVivo 12 (QSR International) was used to help organize the data. Initially each interview was  
140 coded using an inductive-approach and primary cycle coding (23). This began with a close  
141 reading of the data, assigning words or phrases that captured the essence of each sentence.  
142 From this a codebook was developed (supplementary file “Code Book”), and second level codes  
143 were generated to identify emerging themes across the data. Throughout analysis data was  
144 revisited to allow for the comparison and modification of codes to fit new incoming data.

145

146 Rigor was maintained throughout by a second data analyst. Analysts coded identical interviews  
147 separately and then compared coding to promote consistency. Analysts met weekly to discuss  
148 changes and modifications needed for the coding framework. The coding framework and  
149 emerging analysis was discussed and agreed within the research team. The data was further  
150 interpreted to identify themes connecting the data across communities (23).

### 151 Knowledge Translation

152 Emerging themes are disseminated to policy makers, physicians, allied health professionals,  
153 First Nations, municipality members, academics, and the general public through various  
154 knowledge translation outputs such as a six-monthly JSC and publicly available community  
155 feedback reports (<https://ruralsitevisits.rccbc.ca/project-documentation/>) and newsletters,  
156 specialized (focused) reports, presentations, briefing notes, and publications. Additionally, an  
157 innovations website (<https://ruralsitevisits.rccbc.ca/innovations/>) has been established to share  
158 successful innovations identified by interviewees.

### 159 **Ethics**

160 The study received harmonized ethics approval from the Behavioral Research Ethics Board of  
161 the University of British Columbia. Operational approval was also received from each health  
162 authority. Informed consent is collected from all participants.

### 163 **Results**

#### 164 Site Visits Engagement Process

165 Although the Covid-19 pandemic has significantly slowed down the project, 382 interviews have  
 166 been carried out in 107 communities over a three-year period (Table 1). The first 4 site visits to  
 167 9 communities with 23 interviews were used to pilot and develop the methods and were not  
 168 included in the analysis reported here which is based on 185 interviews with 754 participants in  
 169 80 communities. The data from the remaining 27 site visits are being transcribed, returned to  
 170 participants and analysed. As the data is well saturated and the processes take several months  
 171 it seems appropriate to report the study now.

172 [Table 1 Partner groups and numbers of interviews](#)  
 173

| <b>Health Partner Groups</b>             | <b>Definition</b>                                                                                                           | <b>Number of Interviews Analyzed</b>  | <b>Number of Pilot Interviews Analyzed</b> |
|------------------------------------------|-----------------------------------------------------------------------------------------------------------------------------|---------------------------------------|--------------------------------------------|
| <b>Health Administrators</b>             | Health Services Administrators, health managers, hospital/clinic managers                                                   | 36                                    | 4                                          |
| <b>Physicians</b>                        | Majority were family physicians, but also includes residents, specialists and hospitalists                                  | 52                                    | 6                                          |
| <b>Municipal / Community Members</b>     | Mayors, Councilors, Regional District Directors and members, health organizations/societies                                 | 34<br>(municipal)<br>4<br>(community) | 5                                          |
| <b>First Nations</b>                     | First Nations Band members, elders, Chiefs, health directors, community health representatives, nurses, health coordinators | 29                                    | 2                                          |
| <b>Nurse Practitioners*</b>              | Nurse practitioners (could also include students)                                                                           | 7                                     | 0                                          |
| <b>Midwives*</b>                         | Midwives (could also include students)                                                                                      | 4                                     | 0                                          |
| <b>First Responders*</b>                 | Fire Chiefs, paramedics, community paramedics                                                                               | 1                                     | 0                                          |
| <b>Academics*</b>                        | Clinical professors, clinical teachers, clinical researchers, medical school professors.                                    | 2                                     | 0                                          |
| <b>Combined Partners (group meeting)</b> | Leads (or representatives/proxy's) of each health partner group such as the Mayor, hospital Chief-of-Staff,                 | 16                                    | 6                                          |

|                                   |                                            |                                                                     |                                                                    |
|-----------------------------------|--------------------------------------------|---------------------------------------------------------------------|--------------------------------------------------------------------|
|                                   | First Nations health director, fire chief. |                                                                     |                                                                    |
| <b>Total number of interviews</b> |                                            | 185<br>(interviews analyzed to date not including pilot interviews) | 23<br>(pilot interviews analyzed for primary codebook development) |

174 .

|                                   |     |
|-----------------------------------|-----|
| Number of RSA Communities visited | 80  |
| Number of interviews analysed     | 185 |
| Number of participants            | 754 |

175

176

177 Across interviews collectively, one participant withdrew their transcript. Many participants  
 178 provided feedback; highlighting their enjoyment of the direct, in-person engagement process  
 179 that was used and the connections they provided:

180 *“I think this has been very informative. Just getting to know what you guys do...and [the]*  
 181 *supports [that exist] and establishing connections and...learning about these connections that*  
 182 *exist that I haven’t tapped into personally so, it’s great.” – Combined Partners*

183 Participants further described how they felt the process allowed for their voices to be heard,  
 184 and their communities to be recognized:

185 *“I appreciate being able to talk...and to give frank feedback because that is tough at times and*  
 186 *this is a good option to do it...some of our issues aren’t really out there right? So, it’s good to be*  
 187 *able to have a voice to be able to indicate this.” – Nurse Practitioner*

188 *“I want to thank you for recognizing us a ‘rural,’ because a lot of people don’t see us as rural.”*

189 *– First Nations*

190 It was commonly voiced by participants that, throughout the engagement process, they'd love  
191 to learn about what other communities have achieved.

192 *"Would love to see information about other initiatives going on around other provinces that  
193 they might be able to learn from." – Combined Partners*

194 *"[We] would like to receive feedback about how [we] work with other communities and what  
195 works well in other communities." – Combined Partners*

196 These requests from participants ultimately led to the creation of the Site Visits Innovations web  
197 site

#### 198 **Site Visits Themes**

199 The data has become well saturated with 36 categories emerging from the data to date. The  
200 ten most common themes are presented briefly to provide context (Table 2), and these will be  
201 the subject of subsequent publications. This article reports three overarching themes that  
202 interconnect all the data: Relationships, Autonomy and Change Over Time.

203

204 Table 2: Rural Site Visits Project Table 2: List of Top 10 Themes

205

| Themes                        | Definitions                                                                                                                                                                                                                                                                                                                                                                                                                |
|-------------------------------|----------------------------------------------------------------------------------------------------------------------------------------------------------------------------------------------------------------------------------------------------------------------------------------------------------------------------------------------------------------------------------------------------------------------------|
| Areas of Opportunity          | Areas of health care that provide an opportunity to be changed or improved upon within reason. Examples range from old & damaged waiting rooms (infrastructure) to miscommunication between two or more stake holding bodies (relationship building).                                                                                                                                                                      |
| Support                       | Areas in which direct support or additional support is requested by any health care partner in any area.                                                                                                                                                                                                                                                                                                                   |
| Transportation                | All methods of transportation utilized by community members for local and long-distance transport. This section includes specific methods, thoughts, successes and challenges related to local transportation, emergency transportation, accessing areas far away (distance) and environmental factors/conditions.                                                                                                         |
| Successful Initiatives        | Initiatives such as measures, models, programs, methods, or systems that have created a beneficial impact in improving the health care and/or health service delivery of a community.                                                                                                                                                                                                                                      |
| Population                    | Health and non-health related (i.e. community events) aspects of a population that relate to a community's population growth, recruitment, and retention                                                                                                                                                                                                                                                                   |
| Health Authorities            | Any reference to interactions with a communities HA and/or to assistance, successes, challenges brought upon a community through their HA. May also include information regarding communities that declare the presence/absence of their ties with their HA.                                                                                                                                                               |
| Scope of Practice & Workload  | The entire role that physicians and/or other health professionals encompass as a rural health care provider. This may include general and or specific skill sets that are required from individuals in a given community. Other concepts included in this section are physician expectations (from self and others), physician wellbeing, and physician burnout (associated with heavy workloads, lack of time off, etc.). |
| Finance                       | Various methods of billing, funding resources, and pay models for physicians within a community. Demonstrates the variety of financial models (both successful and inadequate) utilized within communities.                                                                                                                                                                                                                |
| Services                      | Any health-related service that is at risk of becoming extinct or in need because that service is (1) currently not available in the area and (2) currently in significant demand by patients and health providers.                                                                                                                                                                                                        |
| Patient Capacity & Attachment | Information relating to wait-times for services, family physician availability, or number of beds available within a hospital setting. Includes accounts relating to patient attachment and how patients are attached/unattached in a community.                                                                                                                                                                           |

206



207 Relationships

208 Relationships were important in achieving successful health care outcomes and were built on  
209 communication, trust, transparency and collaboration over time. These themes were evident in  
210 every community:

211 *“It’s really groups of people coming together on committees that have people from city council,*  
212 *the regional district, health boards, and the non-profit societies...and I think if there’s a strength*  
213 *in this community, it’s that there are those connections and people are willing to work together*  
214 *to find solutions locally.” – Combined Partners*

215 Good relationships underpinned communities’ abilities to successfully retain their physicians.  
216 These relationships were with the communities themselves as well as with administrators and  
217 within teams:

218 *“Why do you think they’ve stayed here?” – Interviewer*

219 *“[It’s] the relationship that they [the physicians] maintain with the community...It all*  
220 *comes down to the relationships.” – Municipality*

221 *“When we went to [Health Authority X] to say, ‘We’re having a terrible time retaining our*  
222 *doctors,’ - the turnover was terrible - we got no response from the system. So, the community*  
223 *rallied around and did what was necessary to sustain doctors in this community. But in doing*  
224 *that .... what we did was create relationships with our physicians that are respectful and goes*  
225 *[both] ways.” – Community Members*

226 Effective communication and regular “organic” contact were the foundation of these  
227 relationships and were important in building trust:

228 *“Having all the different services all in the one building does allow for good open*  
229 *communication, you can pull anyone aside if you bump into them in the hallway to talk about*  
230 *patients. It is a very organic process rather than a formalized team-based care approach. ... It*  
231 *also helps retain people who work here – you build that relationship and trust of what your*  
232 *peers are capable of. It’s not formal team-based care, but it is a team.” – Combined Partners*

233  
234 *“There needs to be trust and consistency of knowing what someone is walking into. Issues of*  
235 *trust [have been] a major block in [our] community to providing and receiving health services.”*  
236 *– Health Admin*

237 Successful collaborations that were inclusive of all partners positively impacted health care and  
238 helped reduce burnout:

239 *“It makes it much easier working [here], because I’ve worked here a really long time with*  
240 *[colleagues X and Y] it makes it much easier when we have a group that all works together*  
241 *really well. And that doesn’t happen everywhere. [We] are all friends so [we] tend to help each*  
242 *other out... being [without them] ...the burnout would be terrible.” – Physicians*

243 *“It’s really groups of people coming together on committees that have people from city council,*  
244 *the regional district, health boards, and the non-profit societies that identify the problems and*  
245 *look at what each particular group...can provide to try to deal with the problem and...it’s those*

246 *connections and people [who] are willing to work together to find solutions locally.”*

247 *– Combined Partners*

248 Conversely, poor collaboration and relationships led to adverse consequences:

249 *“...when I meet with my doctors, I hear one thing about what the problem is and how to solve it.*

250 *And then, if I talked to nurses or midwives or allied health professionals, I hear another version*

251 *of what the problem is and how we would fix it. And then I sit down with [Health Authority X]*

252 *and I hear their version of what the problem is and that they are fixing it. And all those voices*

253 *are never in the same room at the same time...” – Municipality*

254 Good relationships enhance problem solving, reduce the ‘red tape’ required to affect change

255 and result in greater work satisfaction at all levels, positively affecting other issues such as

256 recruitment, retention, and burnout. Local decision making (autonomy) was an important

257 contributor to work satisfaction.

## 258 Autonomy

259 Autonomy within the health care context was defined in many ways. However, at its core many

260 viewed autonomy as the ability to make reasonable decisions, sensitive to the local context, at

261 a personal or local level that did not require the blessings of a hierarchical, top-down system.

262 The latter stifled initiative, innovations, and satisfaction.

263 A sense of autonomy within the health care providers appears to improve recruitment and

264 retention. It imbued a sense of greater ‘ownership’ of, or responsibility for, the local services by

265 the community practitioners:

266 *“Part of it is the relationship that they maintain with the community...Dr [X] has come to the*  
267 *council and has asked for extra room to bring in more medical professionals, and the city*  
268 *worked with him so that he can have the space to have another professional help out his team.*  
269 *The main thing is working with them and letting them grow, not dictating to the doctors.”*  
270 *– Municipality*

271 The data described a disconnect between centrally directed processes and what was practically  
272 achievable in a community:

273 *“...I think there’s kind of an issue sometimes with delivery of rural health care in that people*  
274 *actually in the trenches doing the job have a much better insight sometimes into what needs to*  
275 *be done and what is happening than the people making the decisions about how we’re going to*  
276 *deliver the health care.” – Physicians*

277 The most frequent plea was that more local engagement was needed to solve local problems  
278 and how important local autonomy was in crafting enduring solutions:

279 *“I couldn’t believe that – ‘we are bringing more resources and that’s not working for you?’*  
280 *What didn’t happen is there was no consultation, so it didn’t really matter if we brought more*  
281 *resources. It was like, ‘you didn’t ask us what our problem is, what we need and what is our*  
282 *reality and you’re just bringing resources and that’s not how we want this to look like...”*  
283 *– Health Admin*

284 *“...locally it feels like our concerns are profoundly dismissed by the health authority, who clearly*  
285 *have a different idea and a different agenda” ... “We need to be kind of at least a largely*  
286 *autonomous community.” – Physicians*

287 When consultation occurred a very different attitude existed among the health care providers:

288 *“...So, we took that learning and stepped back and took one whole year to do focus group and to*  
289 *follow staff to understand what they're doing, what are the challenges, the issues, to*  
290 *understand better the population that we serve...involving physicians along the way and after*  
291 *we've done all of this, we came up with another model, not really with much more budget...but*  
292 *it wasn't about the budget anymore and we've presented the model to the staff in March and*  
293 *since then, we are implementing the new model and it's working and people are just following*  
294 *along the process and I think that there's a lot of learning about the history of the community*  
295 *and how we need to do things here.” – Health Admin*

296 Local autonomy meant the ability to make rapid operational decisions on the day. Many small  
297 rural communities had extraordinary stories of unbroken 24/7 emergency coverage for many  
298 years provided by the local practitioners despite being reduced to a single physician at times.  
299 Similarly, nurses in small rural hospitals frequently did additional shifts to cover gaps when their  
300 colleagues were unable to work. These providers felt a responsibility to maintain these services  
301 in their community:

302 *“I had a lot of autonomy about who I could hire...and so I had the ability to hire locally and so I*  
303 *built a big pool of people who lived here who were very committed to [the] Healthcare Centre.”*  
304 *– Health Admin*

305 When control of these services was elevated to a higher level outside of the community, this  
306 loyalty was reduced as local autonomy was lost, contributing to Emergency Room coverage  
307 gaps and difficulty filling nursing shifts:

308 *“...So now we have one GP who is keeping the whole system going through being on call 24*  
309 *hours a day, 7 days a week. So, it’s sort of a step backwards, and I think a lot of it is just that*  
310 *we’ve lost the autonomy to be able to kind of say, “Well, this is what our community needs. This*  
311 *is how we can go about solving this problem.” – Physicians*

312 *“...you’ve done a really innovative thing in adjusting your nursing lines...this is the first*  
313 *community we have not heard [about] nursing shortages.” – Interviewer*

314 *“So, we need to start developing our rotations to make it attractive for those nurses to*  
315 *come...We’re one of the few rural sites that have full staffing now.” – Health Administrator*

316 One example of a successful model is a 3-year trial in a region where a Health Authority granted  
317 three geographically close rural communities the autonomy to determine their priorities for  
318 improving local health care, and provided funding to support these changes:

319 *“We had a series of engagement events for the entire community, health care providers, public,*  
320 *youth at one of the high schools, our Indigenous population, and the [Community X Group] and*  
321 *said, where would you like to spend \$500,000 on services and so 5 things came to the top...”.* –

322 [RCCbc Video](#)

323 Autonomy as defined by the local ability to make relevant health care decisions, runs through  
324 all the data as a foundational theme in supporting system improvement.

325 Change Over Time

326 “Change over time” is a prominent contextual factor that underpins all the themes within the  
327 SV Project to date. One of the biggest changes over time has been the change in community

328 population. Some remote and resource-based communities reported diminishing populations,  
329 however, this was much less common than those reporting increased population growth due to  
330 young families leaving cities to find affordable housing and retirees moving in. In addition, there  
331 is a growing tourism load in many communities. These factors, exacerbated by the expectations  
332 of care for those that have moved into the community, have impacted resources and funding  
333 for longstanding residents:

334 *"...a lot of communities are struggling with what to do with a very quickly growing, aging*  
335 *population...we have a very strong in-migration of young families..." – Municipality*

336 *"[Our] patient population has increased... [and the] infrastructure has not changed."*

337 *– Physicians*

338 *"...communities in [Region X] have been shrinking since forestry work has moved [away from*  
339 *Region X]."* – Municipality

340 Participants emphasized how demographic and population changes have created local concerns  
341 that the community services are not adapted to the changing contexts; thereby causing issues  
342 that relate to capacity, patient access, staffing, service demands, manpower, and funding that  
343 do not meet the communities' needs:

344 *"...our community is growing, like our nation is growing, but the services haven't. And so,*  
345 *everyone's fighting for a doc..." – First Nations*

346 *"I think we're just lacking that vision for the hospital in what is a basic level of service to serve a*  
347 *growing community of 21,000 that also supports 2-3 communities north of us."* – Municipality

348 *“...And trying to actually keep up from a staffing perspective, from a staff retention, everything*  
349 *from a budget, like it’s we are playing a really hard game of catch-up because it’s growing*  
350 *faster than we can even account for and put in services to meet the needs. That’s what I think*  
351 *the biggest challenge is...” – Health Admin*

352 Rural communities are dynamic and, because of their size and isolation, particularly vulnerable  
353 to changes, which may not be easily anticipated. Change is continual and only those that have  
354 the ability to find ways to adapt are able to continue to deliver effective health services.

355

## 356 **Discussion**

357 The Site Visit Project has strengths in the degree of its engagement and, after engaging with  
358 107 rural communities and conducting 382 interviews, it has shown that it is possible to collect  
359 large volumes of data about local health care issues in a systematic and meaningful way in  
360 order to influence provincial health service changes. The fact that the Site Visits team travels to  
361 each community appears to have a strong influence on the relationships and trust experienced  
362 in the interviews. Many of the interviewees have informally commented on this fact, noting  
363 that they feel that the Site Visits team now understands their remoteness, available services,  
364 difficulties with transporting patients etc., and that they feel ‘heard’. One limitation of this  
365 project is that it was carried out in British Columbia and supported by adequate resourcing  
366 through negotiated public funds allocated through the provincial physician organization. This  
367 means that it is specific to the context of British Columbia but may have elements transferable



368 to other settings. It would only be possible to replicate this project with sufficient funding  
369 supports.

370 The major themes are being identified and the analyzed data shared as specialized reports to  
371 both the micro and macro policy maker levels, connecting them in a manner that is resulting in  
372 some early systemic changes. Emergency transportation is one example  
373 (<https://news.gov.bc.ca/releases/2020PREM0020-000725>) where the provincial government have  
374 recently announced further rural emergency transport resources. The processes described have  
375 implications for policy makers in terms of rural health, ones that can be adapted to different  
376 contexts.

377 The three themes described in this article appear as patterns throughout the data set. They are  
378 interlinked and can be seen as foundational elements for effective functioning of health care  
379 services in rural communities. Good relationships between providers, health authority  
380 administration, external specialist services and community members were repeatedly identified  
381 as being responsible for high functioning, successful communities. This means that effort needs  
382 to be made to create the time and space to develop relationships and that these efforts are  
383 valued by all sectors. Part of the importance of relationships was linked to the concept of  
384 autonomy which in this sense meant the ability to make local decisions when needed.

385 Autonomy impacted both the sense of wellbeing of the partners, but could also produce very  
386 practical, rapidly implemented changes with positive results, for example in the community of  
387 Hope ([https://www.youtube.com/watch?v=49GM7-AROXM&t=1s&ab\\_channel=TheRCCbc](https://www.youtube.com/watch?v=49GM7-AROXM&t=1s&ab_channel=TheRCCbc)) . The  
388 exercise of autonomy however can be problematic if not carried out within an agreed  
389 framework that requires the limits of decision making to be set and agreed with health service

390 administration and which recognizes historical power differences in health care (15, 24). Finally,  
391 change over time is recognized as being an important contextual factor in the provision of  
392 services to small rural communities and the resilience of these communities seems related to  
393 their ability to adapt to often unexpectedly changing circumstances. Such adaptation would  
394 appear to be easier in a context of good relationships and an agreed approach to local  
395 autonomy.

396 There are many examples in the literature of community engagement, though the literature  
397 does not appear to contain any examples of such widespread engagement being used to  
398 support policy change at a provincial level. The SV Project benefited from the fact that it is  
399 purely about listening. It did not promise change, but rather that the information gathered  
400 would inform change. Using Boelen's Health Care Partners model at micro and macro levels  
401 (20), the results of the SV Project are being used to discuss contextually appropriate changes for  
402 rural health care. Having all the partners present at these discussions appears to increase the  
403 chances of producing successful and sustainable outcomes. The findings fit within the "five  
404 rules of Large System Transformation" described by Best et al (25) and illustrate that rural  
405 health care is a complex adaptive system. While this study does not attempt to explore  
406 complexity, it does offer a framework for engagement and data gathering that is sensitive to  
407 complexity and local contexts and may point to an example of the paradigm shift Greenhalgh  
408 and Papoutsis call for in their editorial on studying complexity in health services research (26).

409

410 **Limitations**

411 Not all partner groups existed or were available to meet in some communities. The latter was  
412 rare and virtual meetings were arranged when necessary.

413 Because the Site Visits teams were led by experienced health care providers, a power  
414 differential existed during the interviews which may have been inhibitory, particularly when  
415 interviewing Indigenous groups.

416 As the interviews were led by health care providers it is possible that they may have biased the  
417 discussions.

418 The data collected is specific to the geography, health system and rural context of BC and may  
419 not be fully transferable to other settings.

420 A potential future limitation may be disengagement by the communities from further site visits  
421 if there no beneficial changes are seen to occur.

## 422 **Conclusion**

423 By modifying Boelen's approach to partnership in health development the SV Project has  
424 demonstrated a successful way to engage rural communities and gather extensive data that can  
425 be used to inform rural health care policy in an ongoing and contextually appropriate manner.

426 Relationships, communication and relevant data are the cornerstones that successful  
427 sustainable change is built on.

428 While every rural community is different, this project elicited many common themes that have  
429 linked the health care issues in rural BC. Although early changes have already occurred, further

430 research will be needed to determine whether the changes resulting from the SV Project are  
431 beneficial and sustainable with time.

#### 432 **Funding**

433 This project is supported by funds from the Joint Standing Committee on Rural Issues through  
434 funding negotiated through the Ministry of Health and Doctors of BC's Physician Master  
435 Agreement. Those funds are administered by the Rural Coordination Centre of BC. There is no  
436 grant number.

#### 437 **Data Sharing**

438 Due to the confidential nature of the interview data the raw data is not publicly available. All  
439 interim reports and innovations are available through public websites and links are embedded  
440 in the body of the text.

#### 441 **Competing Interests**

442 Stuart Johnston is funded as a Director of the RCCbc. Erika Belanger and Krystal Wong are full-  
443 time employees of the RCCbc. David Snadden was the Inaugural Rural Doctors' University of  
444 British Columbia (UBC) Chair in Rural Health from 2016 to 2020, which is supported by an  
445 endowment to the UBC from the Rural Doctors' of BC through the JSC. He also sits on the RCCbc  
446 Leadership group to provide an academic perspective. He is fully funded by the Faculty of  
447 Medicine at UBC as a Professor of Family Practice. There are no other competing interests.

#### 448 **Author Contributions**

449 Stuart Johnston is the project lead, has been involved in all stages of the project design, has  
450 attended visits and has helped with data analysis. He wrote the first draft of the article.

451 Erika Belanger is the primary analyst and developed the analytic methodology, the codebook  
452 and the initial content analysis. She has attended visits and contributed to all sections of the  
453 article.

454 Krystal Wong developed the Site Visits processes, attended visits, has been involved in all  
455 conversation in terms of the analysis and contributed to all sections of the article.

456 David Snadden developed the qualitative methodology and guided the research methodology,  
457 assisted with analysis and determining themes and contributed to all sections of the article  
458 including developing and editing the final pre-submission draft.

459 For researcher reflexivity statements see supplementary file “Team Reflexivity”.

#### 460 Acknowledgements

461 We would like to thank the entire RCCbc Site Visits Project team for helping with the  
462 administrative coordination and reach out to communities throughout the duration of this  
463 work. We would also like to thank Gemma McEachern for providing key supports during the  
464 initial phases of this project and Anne Lesack for assisting with the data analysis throughout this  
465 project. We would like to further extend our thanks to Dr. Martha McLeod and Jason Curran for  
466 providing us with an external review and feedback on our manuscript. Thank you to the Joint  
467 Standing Committee for funding this work and allowing us to continue this project.

468 Most importantly, we wish to acknowledge all our participants who chose to welcome us to  
469 their communities and allowed us to listen to their experiences and perspectives. We thank you  
470 for participating in this work and contributing your voices.

471

472 Word Count, 4877 for main text

473

474

## 475 **References**

476

- 477 1. Population and Dwelling Count Highlight Tables, 2016 Census Ottawa: Statistics Canada; 2016  
478 [Available from: [https://www12.statcan.gc.ca/census-recensement/2016/dp-pd/hlt-fst/pd-](https://www12.statcan.gc.ca/census-recensement/2016/dp-pd/hlt-fst/pd-pl/Table.cfm?Lang=Eng&T=703&SR=1&S=87&O=A&RPP=25&PR=59&CMA=0&CSD=0#map-popup)  
479 [pl/Table.cfm?Lang=Eng&T=703&SR=1&S=87&O=A&RPP=25&PR=59&CMA=0&CSD=0#map-popup](https://www12.statcan.gc.ca/census-recensement/2016/dp-pd/hlt-fst/pd-pl/Table.cfm?Lang=Eng&T=703&SR=1&S=87&O=A&RPP=25&PR=59&CMA=0&CSD=0#map-popup).
- 480 2. Supply, Distribution and Migration of Physicians in Canada 2018: Data Tables Ottawa: Canadian  
481 Institute for Health Information; 2018 [Available from:  
482 <http://indicatorlibrary.cihi.ca/display/HSPIL/Proportion+of+Physicians+in+Rural+Areas>.
- 483 3. Hanlon N, Halseth G. The greying of resource communities in northern British Columbia.  
484 Canadian Geographer. 2005;49(1):24.
- 485 4. Declaration of Alma-Ata International Conference on Primary Health Care 1978; Alma-Ata USSR:  
486 World Health Organisation.
- 487 5. Teja B, Daniel I, Pink GH, Brown A, Klein DJ. Ensuring adequate capital investment in Canadian  
488 health care. CMAJ. 2020;192(25):E677-E83.
- 489 6. Sullivan L, Ryser L, Halseth G. Recognizing Change, Recognizing Rural: The New Rural Economy  
490 and Towards a New Model of Rural Service. Journal of Rural and Community Development.  
491 2014;9(4):219-45.
- 492 7. Hanlon N, Macleod ML, Reay T, Snadden D. Partnering for Health Care Sustainability in Smaller  
493 Urban Centres: Why and How a Health Authority Chose to 'Go Upstream'. In: Halseth G, Markey S, Ryser  
494 L, editors. Service Provision and Rural Sustainability. First Edition ed. New York: Routledge; 2018. p. 80-  
495 95.
- 496 8. Nel E, Connelly S. Rural health service delivery challenges in an era of neoliberalism in New  
497 Zealand. In: Halseth G, Markey S, Ryser L, editors. Service Provision and Rural Sustainability. New York:  
498 Routledge; 2019. p. 65-79.
- 499 9. Mahmud S. Citizen Participation in the Health Sector in Rural Bangladesh. IDS Bulletin.  
500 2004;35(2):7.

- 501 10. Nimegeer A, Farmer J, Munoz SA, Currie M. Community participation for rural healthcare design:  
502 description and critique of a method. *Health Soc Care Community*. 2016;24(2):175-83.
- 503 11. Petersen I, Baillie K, Bhana A, Mental H, Poverty Research Programme C. Understanding the  
504 benefits and challenges of community engagement in the development of community mental health  
505 services for common mental disorders: lessons from a case study in a rural South African subdistrict site.  
506 *Transcult Psychiatry*. 2012;49(3-4):418-37.
- 507 12. Farmer J, Philip L, King G, Farrington J, Macleod M. Territorial tensions: misaligned management  
508 and community perspectives on health services for older people in remote rural areas. *Health Place*.  
509 2010;16(2):275-83.
- 510 13. Davy C, Cass A, Brady J, DeVries J, Fewquandie B, Ingram S, et al. Facilitating engagement  
511 through strong relationships between primary healthcare and Aboriginal and Torres Strait Islander  
512 peoples. *Australian and New Zealand Journal of Public Health*. 2016;40(6):535-41.
- 513 14. Kenny A, Hyett N, Sawtell J, Dickson-Swift V, Farmer J, O'Meara P. Community participation in  
514 rural health: a scoping review. *BMC Health Serv Res*. 2013;13:64.
- 515 15. MacLeod MLP, Hanlon N, Reay T, Snadden D, Ulrich C. Partnering for change: How a health  
516 authority, physicians and communities work together to transform primary healthcare services. *J Health  
517 Organ Manag*. 2019;34(3):255-72.
- 518 16. Farmer J, Nimegeer A. Community participation to design rural primary healthcare services.  
519 *BMC Health Serv Res*. 2014;14:130.
- 520 17. Hammanyero KI, Bawa S, Braka F, Bassey BE, Fatiregun A, Warigon C, et al. Lessons learnt from  
521 implementing community engagement interventions in mobile hard-to-reach (HTR) projects in Nigeria,  
522 2014-2015. *BMC Public Health*. 2018;18(Suppl 4):1306.
- 523 18. Farmer J, Taylor J, Stewart E, Kenny A. Citizen participation in health services co-production: a  
524 roadmap for navigating participation types and outcomes. *Aust J Prim Health*. 2017;23(6):509-15.
- 525 19. Farmer J, Currie M, Kenny A, Munoz SA. An exploration of the longer-term impacts of  
526 community participation in rural health services design. *Soc Sci Med*. 2015;141:64-71.
- 527 20. Boelen C. *Towards Unity for Health: Challenges and Opportunities for Partnerships in Health  
528 Development*. Geneva, Switzerland: World Health Organisation, WHO/EIP/OSD/2000.9; 2000.
- 529 21. Carter CA, Ruhe MC, Weyer S, Litaker D, Fry RE, Stange KC. An appreciative inquiry approach to  
530 practice improvement and transformative change in health care settings. *Qual Manag Health Care*.  
531 2007;16(3):194-204.
- 532 22. Whitney D, Trosten-Bloom A. *The Power of Appreciative Enquiry: a Practical guide to Positive  
533 Change*. 2nd ed. San Francisco: Berrett-Koehler; 2010.
- 534 23. Patton MQ. *Qualitative Evaluation and Research Methods: Integrating Theory and Practice*.  
535 Fourth Edition ed. Thousand Oaks, California: Sage; 2015.
- 536 24. Snadden D, Reay T, Hanlon N, MacLeod M. Engaging primary care physicians in system change -  
537 an interpretive qualitative study in a remote and rural health region in Northern British Columbia,  
538 Canada. *BMJ Open*. 2019;9(5):e028395.
- 539 25. Best A, Greenhalgh T, Lewis S, Saul JE, Carroll S, Bitz J. Large-system transformation in health  
540 care: a realist review. *The Millbank Quarterly*. 2012;90(3):35.
- 541 26. Greenhalgh T, Papoutsi C. Studying complexity in health services research: desperately seeking  
542 an overdue paradigm shift. *BMC Med*. 2018;16(1):95.

543

544

545
